# Supplementary material for: ‘Don’t Put the Cart before the Mule!’ Challenging Assumptions Regarding Health-Related Treatment Practices of Working Equid Owners in Northern India
Source: MDPI journal article supplement (doi:10.3390/ani11051307), 2021-05-01
Supplement: s1 [file s1]

## Livelihoods Survey

|                                                                                               |                                |
|-----------------------------------------------------------------------------------------------|--------------------------------|
| Type of location                                                                              | Brick Kiln                     |
|                                                                                               | Village                        |
|                                                                                               | City                           |
|                                                                                               | Pharmacy                       |
|                                                                                               | Other                          |
| Name of location                                                                              |                                |
| Person ID                                                                                     |                                |
| Do you consent to participating in this survey                                                |                                |
| Age                                                                                           | Under 18                       |
| Thank participant for their time. Please stop the survey.                                     |                                |
|                                                                                               | 18-30                          |
|                                                                                               | 30-50                          |
|                                                                                               | Over 50                        |
|                                                                                               | Prefer not to answer (over 18) |
| Gender                                                                                        | Male                           |
|                                                                                               | Female                         |
|                                                                                               | Other                          |
| Place of Birth                                                                                |                                |
| Who is head of your household?                                                                |                                |
| How many adults (18 and over) in your household?                                              |                                |
| How many male children (under 18) in your household?                                          |                                |
| How many female children (under 18) in your household?                                        |                                |
| What is your main job role currently?                                                         | Donkey/mule owner              |
|                                                                                               | Donkey/mule handler            |
|                                                                                               | Vet                            |
|                                                                                               | Agrovet                        |
|                                                                                               | Drug retail outlet worker      |
|                                                                                               | Qualified pharmacist           |
|                                                                                               | Other (please specify)         |
| Do you have other job roles or sources of income?                                             | Yes                            |
|                                                                                               | No                             |
|                                                                                               | Unsure                         |
|                                                                                               | Prefer not to answer           |
| What is your personal weekly income (in total, including money saved and spent)?              |                                |
| How much does your whole household earn per week (in total, including money saved and spent)? |                                |
| What is your education level?                                                                 | None                           |
|                                                                                               | Primary                        |
|                                                                                               | Secondary                      |
|                                                                                               | University/ college            |
|                                                                                               | Other (please specify)         |
| What is your ethnic group?                                                                    |                                |

|                                                                             |                           |
|-----------------------------------------------------------------------------|---------------------------|
| What is your religion?                                                      | Hindu                     |
|                                                                             | Buddhist                  |
|                                                                             | Muslim                    |
|                                                                             | Christian                 |
|                                                                             | Jewish                    |
|                                                                             | Other (please specify)    |
|                                                                             |                           |
| Is your present place of residence:                                         | Temporary                 |
|                                                                             | Permanent                 |
| Home ownership                                                              | Own                       |
|                                                                             | Rent                      |
|                                                                             | Stay with family/ Friends |
|                                                                             | Prefer not to answer      |
|                                                                             | Other (please specify)    |
| Where is your permanent home?                                               |                           |
| Where is your temporary home?                                               |                           |
| Do you own or rent any land in your permanent home?                         | Own                       |
|                                                                             | Rent                      |
|                                                                             | No                        |
|                                                                             | Other (please specify)    |
| Do you have any of the following in your household?                         | Electricity               |
|                                                                             | Mobile phone              |
|                                                                             | Motorbike                 |
|                                                                             | TV                        |
|                                                                             | Computer                  |
|                                                                             | Car                       |
| Do you own any donkeys/mules?                                               | Yes                       |
|                                                                             | No                        |
| How many donkeys/mules do you own?                                          |                           |
| What percentage of your annual income is dependent on your donkeys / mules? |                           |
| On average, how much do you pay for a donkey / mule?                        |                           |
| Where did you obtain your donkeys/mules?                                    |                           |
| On average how many years do you keep your donkeys/ mules?                  |                           |
| What is the average age of your donkeys/ mules?                             |                           |
| How many years have you worked with donkeys/mules?                          |                           |
| Do you think working with donkeys/mules changes your social status?         | Increases                 |
|                                                                             | Decreases                 |
|                                                                             | No change                 |
|                                                                             | Unsure                    |
